# Supplementary material for: Enhanced tetragonality and large negative thermal expansion in a new Pb/Bi-based perovskite ferroelectric of (1 − x)PbTiO3–xBi(Zn1/2V1/2)O3
Source: Royal Society of Chemistry journal article supplement (doi:10.1039/c9qi00450e), 2019-01-01
Supplement: c9qi00450e1.pdf [file c9qi00450e1.pdf]

## Supplementary Information

### **Enhanced tetragonality and large negative thermal expansion in a new Pb/Bi-based perovskite ferroelectric of $(1-x)\text{PbTiO}_3-x\text{Bi}(\text{Zn}_{1/2}\text{V}_{1/2})\text{O}_3$**

Zhao Pan,<sup>1,2,\*</sup> Jun Chen,<sup>3</sup> Xingxing Jiang,<sup>4</sup> Zheshuai Lin,<sup>4</sup> Haibo Zhang,<sup>1</sup> Yang Ren,<sup>5</sup> Masaki Azuma,<sup>2,\*</sup> and Xianran Xing<sup>3</sup>

<sup>1</sup>*School of Materials Science and Engineering, Huazhong University of Science and Technology, Wuhan 430074, China*

<sup>2</sup>*Laboratory for Materials and Structures, Tokyo Institute of Technology, 4259 Nagatsuta, Midori, Yokohama, 226-8503, Japan*

<sup>3</sup>*Department of Physical Chemistry, University of Science and Technology Beijing, Beijing 100083, China*

<sup>4</sup>*Institute of Physics and Chemistry, Chinese Academy of Sciences, Beijing 100190, China*

<sup>5</sup>*X-ray Science Division, Argonne National Laboratory, Argonne, Illinois 60439, United States*

---

\*Corresponding author: [zhaopan@mssl.titech.ac.jp](mailto:zhaopan@mssl.titech.ac.jp); [mazuma@mssl.titech.ac.jp](mailto:mazuma@mssl.titech.ac.jp).

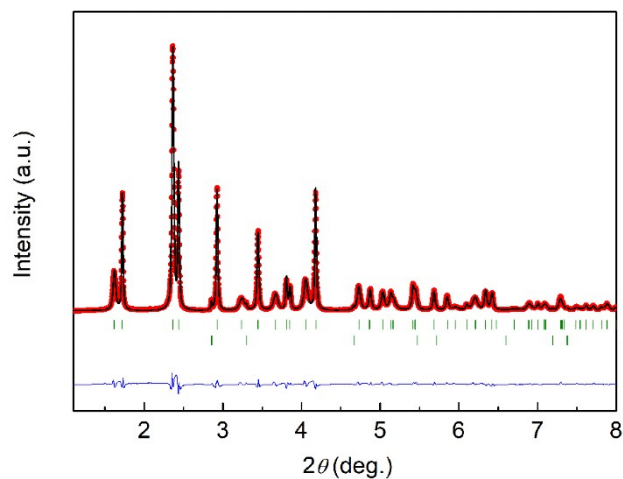

**Figure S1.** Rietveld full profile refinement of SXRD patterns of tetragonal 0.9PT-0.1BZV at room temperature. Observed (red, solid circles), calculated (black line), and their difference profiles (bottom line) are shown. The Bragg reflection positions are indicated by the green ticks. Note that a minority phase of Au derived from the gold capsule for the high-pressure experiment was observed for all investigated samples.

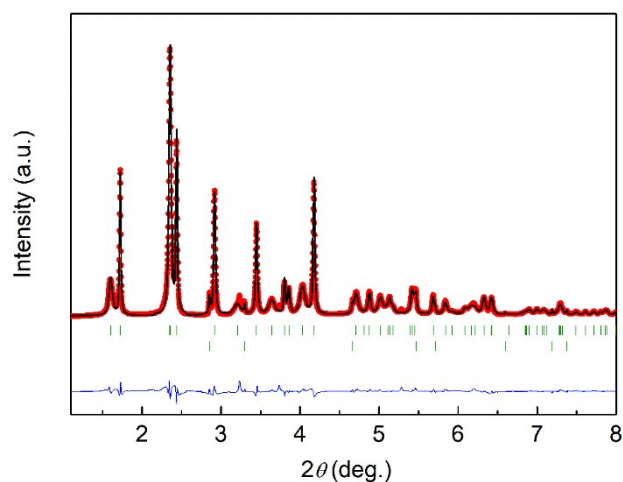

**Figure S2.** Rietveld full profile refinement of SXRD patterns of tetragonal 0.8PT-0.2BZV at room temperature. Observed (red, solid circles), calculated (black line), and their difference profiles (bottom line) are shown. The Bragg reflection positions are indicated by the green ticks.

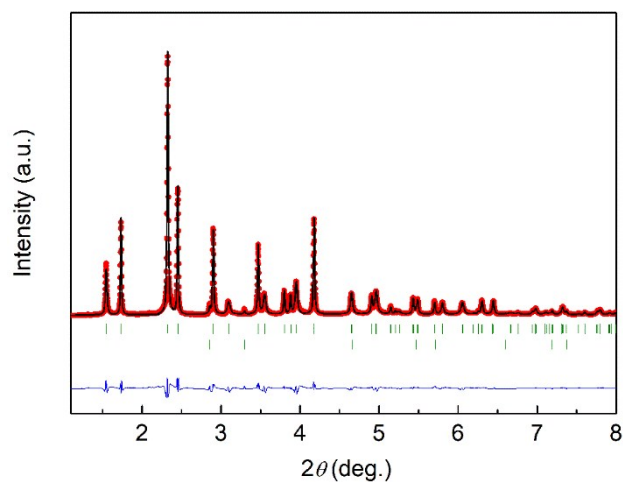

**Figure S3.** Rietveld full profile refinement of SXRD patterns of tetragonal 0.7PT-0.3BZV at room temperature. Observed (red, solid circles), calculated (black line), and their difference profiles (bottom line) are shown. The Bragg reflection positions are indicated by the green ticks.

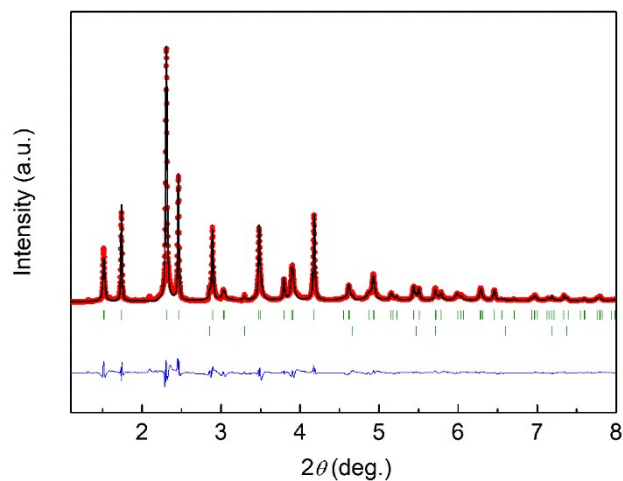

**Figure S4.** Rietveld full profile refinement of SXRD patterns of tetragonal 0.6PT-0.4BZV at room temperature. Observed (red, solid circles), calculated (black line), and their difference profiles (bottom line) are shown. The Bragg reflection positions are indicated by the green ticks.

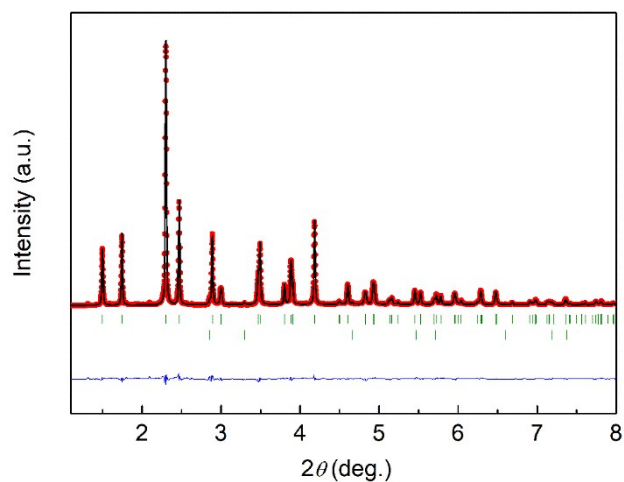

**Figure S5.** Rietveld full profile refinement of SXR D patterns of tetragonal 0.5PT-0.5BZV at room temperature. Observed (red, solid circles), calculated (black line), and their difference profiles (bottom line) are shown. The Bragg reflection positions are indicated by the green ticks.

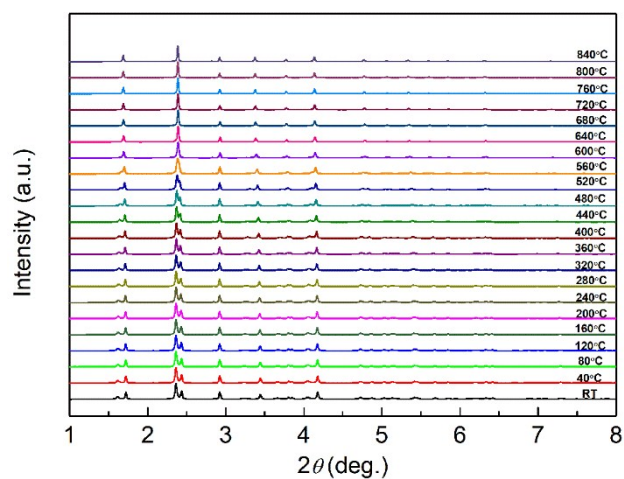

**Figure S6.** Temperature dependence of SXR D patterns of 0.9PT-0.1BZV with an interval of 40 °C.

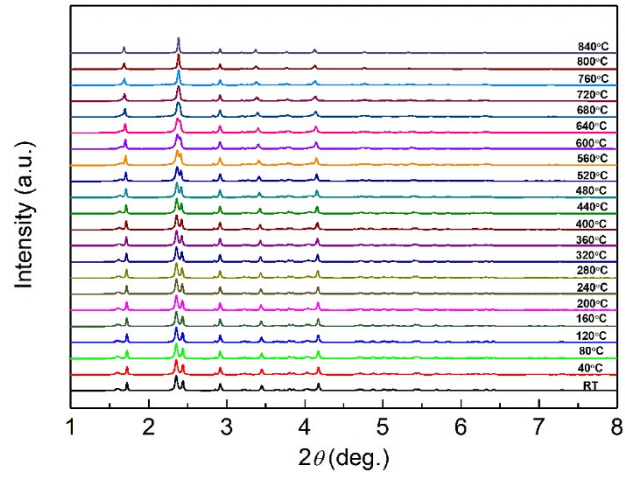

**Figure S7.** Temperature dependence of SXRD patterns of 0.8PT-0.2BZV with an interval of 40 °C.
